# Supplementary material
Source: PubMed Central journal article supplement (PMC2656188)
Supplement: 0813333106_ST1_PDF.pdf [file 0813333106_ST1_PDF.pdf]

**Table S1.** Genes expressed at higher levels in the lines without wt TP53 genes relative to those with wt TP53 genes following gamma irradiation.

| Symbol*  | ID           | HCT116 <sup>†</sup> |     |         | DLD-1 |           | RKO |     | SW48 |     |
|----------|--------------|---------------------|-----|---------|-------|-----------|-----|-----|------|-----|
|          |              | +/+                 | -/- | R248W/- | +/SIL | S241F/SIL | +/+ | -/- | +/+  | -/- |
| ASPM     | NM_016426    | 1.0                 | 3.3 | 2.6     | 1.0   | 6.1       | 1.0 | 2.5 | 1.0  | 3.7 |
| AURKB    | NM_002497    | 1.0                 | 2.9 | 2.1     | 1.0   | 2.8       | 1.0 | 2.4 | 1.0  | 3.3 |
| BIRC5    | NM_152524    | 1.0                 | 2.6 | 2.4     | 1.0   | 3.2       | 1.0 | 2.3 | 1.0  | 2.8 |
| BRRN1    | NM_022346    | 1.0                 | 3.3 | 2.7     | 1.0   | 4.4       | 1.0 | 2.1 | 1.0  | 3.1 |
| C17orf41 | NM_003318    | 1.0                 | 2.1 | 2.3     | 1.0   | 2.5       | 1.0 | 2.1 | 1.0  | 2.3 |
| CASC5    | NM_006845    | 1.0                 | 3.2 | 2.5     | 1.0   | 7.1       | 1.0 | 3.3 | 1.0  | 2.5 |
| CCNA2    | NM_004217    | 1.0                 | 4.8 | 3.0     | 1.0   | 4.6       | 1.0 | 2.0 | 1.0  | 3.0 |
| CCNB2    | NM_030932    | 1.0                 | 3.5 | 2.5     | 1.0   | 2.2       | 1.0 | 2.2 | 1.0  | 2.5 |
| CDC2     | NM_012484    | 1.0                 | 3.3 | 2.1     | 1.0   | 3.1       | 1.0 | 2.0 | 1.0  | 2.5 |
| CDC25C   | NM_004701    | 1.0                 | 4.2 | 3.1     | 1.0   | 4.5       | 1.0 | 2.8 | 1.0  | 3.0 |
| CDCA5    | NM_016343    | 1.0                 | 3.7 | 2.7     | 1.0   | 4.0       | 1.0 | 2.2 | 1.0  | 2.6 |
| CDCA8    | NM_138419    | 1.0                 | 3.5 | 2.7     | 1.0   | 3.7       | 1.0 | 2.0 | 1.0  | 2.7 |
| CENPA    | NM_015341    | 1.0                 | 4.6 | 3.2     | 1.0   | 9.9       | 1.0 | 2.9 | 1.0  | 3.2 |
| CENPE    | NM_207418    | 1.0                 | 3.5 | 2.5     | 1.0   | 2.8       | 1.0 | 2.4 | 1.0  | 2.0 |
| CENPF    | NM_017779    | 1.0                 | 3.6 | 3.3     | 1.0   | 19.0      | 1.0 | 2.3 | 1.0  | 3.1 |
| CIT      | NM_012415    | 1.0                 | 2.8 | 2.6     | 1.0   | 2.6       | 1.0 | 2.7 | 1.0  | 2.6 |
| CKAP2L   | NM_024857    | 1.0                 | 4.6 | 3.2     | 1.0   | 5.9       | 1.0 | 2.7 | 1.0  | 2.2 |
| DEPDC1   | NM_007174    | 1.0                 | 3.6 | 3.3     | 1.0   | 3.4       | 1.0 | 2.1 | 1.0  | 3.1 |
| DIAPH3   | NM_006101    | 1.0                 | 3.1 | 2.3     | 1.0   | 2.3       | 1.0 | 3.3 | 1.0  | 2.3 |
| FAM54A   | NM_170589    | 1.0                 | 4.4 | 2.5     | 1.0   | 4.5       | 1.0 | 2.1 | 1.0  | 3.3 |
| FAM72A   | NM_001237    | 1.0                 | 4.3 | 2.4     | 1.0   | 3.5       | 1.0 | 2.5 | 1.0  | 2.5 |
| FLJ39660 | NM_001067    | 1.0                 | 2.4 | 2.3     | 1.0   | 4.6       | 1.0 | 2.5 | 1.0  | 2.3 |
| GTSE1    | BC062449     | 1.0                 | 3.4 | 4.2     | 1.0   | 6.0       | 1.0 | 2.6 | 1.0  | 2.7 |
| HCAP-G   | NM_001813    | 1.0                 | 3.7 | 2.2     | 1.0   | 2.9       | 1.0 | 2.1 | 1.0  | 2.2 |
| HMMR     | NM_001790    | 1.0                 | 4.2 | 3.0     | 1.0   | 3.1       | 1.0 | 2.0 | 1.0  | 2.9 |
| KIF18A   | NM_031217    | 1.0                 | 3.3 | 4.2     | 1.0   | 2.8       | 1.0 | 3.6 | 1.0  | 3.4 |
| KIF20A   | NM_018101    | 1.0                 | 3.9 | 4.3     | 1.0   | 4.8       | 1.0 | 3.0 | 1.0  | 2.9 |
| KIF2C    | NM_152515    | 1.0                 | 3.6 | 2.6     | 1.0   | 3.3       | 1.0 | 2.4 | 1.0  | 2.9 |
| KNTC2    | NM_018136    | 1.0                 | 5.0 | 3.5     | 1.0   | 5.0       | 1.0 | 2.2 | 1.0  | 2.9 |
| NEK2     | NM_001012271 | 1.0                 | 4.8 | 3.8     | 1.0   | 4.0       | 1.0 | 2.5 | 1.0  | 3.4 |

|        |           |     |     |     |     |     |     |     |     |     |
|--------|-----------|-----|-----|-----|-----|-----|-----|-----|-----|-----|
| PLK1   | NM_001809 | 1.0 | 3.7 | 2.7 | 1.0 | 2.8 | 1.0 | 2.2 | 1.0 | 2.7 |
| RAD54B | NM_005733 | 1.0 | 3.2 | 2.2 | 1.0 | 2.2 | 1.0 | 2.3 | 1.0 | 2.8 |
| SGOL2  | NM_001786 | 1.0 | 4.2 | 2.9 | 1.0 | 3.3 | 1.0 | 2.1 | 1.0 | 2.8 |
| TOP2A  | NM_005030 | 1.0 | 2.9 | 2.4 | 1.0 | 2.7 | 1.0 | 2.1 | 1.0 | 2.7 |
| TTK    | NM_080668 | 1.0 | 4.0 | 3.1 | 1.0 | 2.9 | 1.0 | 2.2 | 1.0 | 2.9 |

\* Only genes exhibiting at least 2-fold difference are included.

† The values were normalized as follows: For the HCT116 cell lines to HCT116+/+, for the DLD-1 cell lines to the DLD+/SIL, for the RKO cell lines to RKO +/+, and for the SW48 cell lines to SW48+/+
