# Supplementary material
Source: PubMed Central journal article supplement (PMC2656188)
Supplement: 0813333106_ST2_PDF.pdf [file 0813333106_ST2_PDF.pdf]

Table S2. Gene expression before and after gamma irradiation – wt p53 upregulated genes.

| GeneName   | ID           | Gene description                                                                | Irradiation, 12 Gy |           |      |       |      |       | HCT116 |      |        |        | DLD-1 |      |      |       | RKO  |       |      |      | SW48 |       |       |       |
|------------|--------------|---------------------------------------------------------------------------------|--------------------|-----------|------|-------|------|-------|--------|------|--------|--------|-------|------|------|-------|------|-------|------|------|------|-------|-------|-------|
|            |              |                                                                                 | No                 | Yes       | No   | Yes   | No   | Yes   | No     | Yes  | No     | Yes    | No    | Yes  | No   | Yes   | No   | Yes   | No   | Yes  | No   | Yes   |       |       |
| BBC3       | NM 014417    | Homo sapiens BCL2 binding component 3                                           | 1.00               | 0.49      | 0.88 | 1.35  | 0.65 | 0.78  | 1.00   | 0.80 | 2.21   | 5.18   | 1.00  | 0.60 | 0.92 | 1.32  | 0.54 | 1.00  | 1.00 | 0.86 | 1.08 | 2.14  | 1.35  | 3.68  |
| C1orf57    | NM 032324    | Homo sapiens chromosome 1 open reading frame 57                                 | 1.00               | 1.25      | 1.35 | 3.48  | 0.93 | 2.02  | 1.00   | 0.98 | 1.94   | 4.80   | 1.00  | 0.91 | 1.02 | 1.40  | 0.91 | 1.66  | 1.00 | 0.97 | 0.92 | 1.49  | 1.42  | 2.99  |
| CCNG1      | NM 004060    | Homo sapiens cyclin G1, transcript variant 1                                    | 1.00               | 1.11      | 1.08 | 1.78  | 0.87 | 1.32  | 1.00   | 1.01 | 1.94   | 4.32   | 1.00  | 1.59 | 0.79 | 0.97  | 1.53 | 2.48  | 1.00 | 0.90 | 0.83 | 1.25  | 0.93  | 1.84  |
| CDKN1A     | NM 078467    | Homo sapiens cyclin-dependent kinase inhibitor 1A, transcript variant 2         | 1.00               | 0.87      | 1.65 | 8.76  | 0.98 | 3.23  | 1.00   | 1.59 | 11.15  | 80.83  | 1.00  | 1.17 | 1.95 | 4.32  | 1.12 | 4.28  | 1.00 | 1.34 | 3.22 | 13.09 | 3.31  | 32.80 |
| CSDA       | NM 003651    | Homo sapiens cold shock domain protein A                                        | 1.00               | 1.07      | 1.12 | 1.89  | 0.86 | 1.40  | 1.00   | 1.11 | 2.55   | 3.56   | 1.00  | 1.16 | 0.70 | 1.26  | 1.02 | 1.80  | 1.00 | 0.99 | 0.82 | 1.19  | 1.13  | 1.82  |
| DGKA       | NM 201444    | Homo sapiens diacylglycerol kinase, alpha 80kDa, transcript variant 1           | 1.00               | 0.96      | 0.89 | 2.12  | 0.85 | 1.24  | 1.00   | 0.93 | 2.95   | 6.33   | 1.00  | 1.13 | 1.24 | 1.83  | 0.89 | 1.88  | 1.00 | 1.02 | 1.01 | 1.45  | 1.97  | 3.78  |
| FAS        | NM 000043    | Homo sapiens Fas (TNF receptor superfamily, member 6), transcript variant 1     | 1.00               | 1.57      | 1.58 | 4.38  | 1.39 | 2.99  | 1.00   | 1.60 | 6.93   | 11.61  | 1.00  | 1.27 | 0.81 | 1.39  | 0.50 | 1.97  | 1.00 | 0.98 | 0.67 | 1.79  | 0.62  | 3.06  |
| FDXR       | NM 024417    | Homo sapiens ferredoxin reductase, nuclear gene encoding mitochondrial protein, | 1.00               | art0391   | 1.47 | 5.15  | 1.29 | 4.12  | 1.00   | 0.98 | 5.54   | 10.62  | 1.00  | 1.34 | 0.85 | 1.88  | 0.59 | 2.10  | 1.00 | 1.02 | 1.11 | 2.22  | 1.49  | 3.87  |
| GDF15      | NM 004864    | Homo sapiens growth differentiation factor 15                                   | 1.00               | 0.24      | 0.35 | 1.16  | 0.27 | 0.81  | 1.00   | 0.76 | 0.86   | 3.94   | 1.00  | 0.71 | 3.11 | 8.12  | 4.59 | 33.97 | 1.00 | 0.89 | 2.34 | 10.46 | 2.26  | 30.30 |
| GPR56      | NM 201525    | Homo sapiens G protein-coupled receptor 56, transcript variant 3                | 1.00               | 0.49      | 0.61 | 0.96  | 0.35 | 0.53  | 1.00   | 0.75 | 2.33   | 1.57   | 1.00  | 3.18 | 3.36 | 4.64  | 1.61 | 5.26  | 1.00 | 1.20 | 0.77 | 1.22  | 1.21  | 2.25  |
| LOC401131  | XR 000987    | PREDICTED: Homo sapiens hypothetical LOC401131, transcript variant 1, misc      | 1.00               | 0.90      | 3.34 | 11.64 | 1.07 | 3.00  | 1.00   | 0.41 | 328.05 | 924.03 | 1.00  | 1.37 | 8.45 | 27.13 | 2.89 | 16.98 | 1.00 | 0.45 | 9.29 | 32.75 | 14.23 | 81.15 |
| LOC730999  | XM 001131389 | PREDICTED: Homo sapiens hypothetical protein LOC730999                          | 1.00               | 0.78      | 2.24 | 7.90  | 1.34 | 3.64  | 1.00   | 1.07 | 13.91  | 104.52 | 1.00  | 1.49 | 2.72 | 6.69  | 3.70 | 19.63 | 1.00 | 1.22 | 0.85 | 2.66  | 2.70  | 10.60 |
| MDM2       | NM 002392    | Homo sapiens Mdm2, transformed 3T3 cell double minute 2, p53 binding protein    | art10              | art 1.01v | MDM2 | 2.45  | 0.87 | 1.65  | 1.00   | 1.64 | 7.89   | 20.81  | 1.00  | 1.21 | 1.01 | 2.57  | 0.63 | 2.38  | 1.00 | 1.27 | 1.37 | 3.15  | 1.66  | 7.37  |
| PLK3       | NM 004073    | Homo sapiens polo-like kinase 3 (Drosophila)                                    | 1.00               | 0.81      | 0.72 | 2.31  | 0.54 | 1.33  | 1.00   | 1.05 | 2.17   | 9.60   | 1.00  | 1.03 | 0.99 | 1.71  | 0.60 | 1.55  | 1.00 | 0.75 | 1.16 | 2.06  | 0.95  | 3.44  |
| PPM1D      | NM 003620    | Homo sapiens protein phosphatase 1D magnesium-dependent, delta isoform          | 1.00               | 0.97      | 1.11 | 3.24  | 0.98 | 1.89  | 1.00   | 0.91 | 2.59   | 3.86   | 1.00  | 1.14 | 0.96 | 1.46  | 0.86 | 1.92  | 1.00 | 0.90 | 1.56 | 2.67  | 1.34  | 3.32  |
| RRM2B      | NM 015713    | Homo sapiens ribonucleotide reductase M2 B (TP53 inducible)                     | 1.00               | 1.05      | 1.66 | 3.05  | 1.43 | 2.59  | 1.00   | 1.02 | 5.17   | 13.45  | 1.00  | 1.21 | 1.68 | 2.97  | 0.82 | 2.26  | 1.00 | 0.91 | 0.61 | 1.07  | 0.66  | 1.86  |
| SPATA18    | NM 145263    | Homo sapiens spermatogenesis associated 18 homolog (rat)                        | 1.00               | 1.30      | 1.57 | 4.04  | 0.49 | 0.94  | 1.00   | 1.29 | 46.18  | 100.47 | 1.00  | 1.37 | 0.96 | 1.35  | 4.29 | 14.79 | 1.00 | 0.98 | 1.44 | 2.79  | 1.42  | 5.16  |
| THC2295607 | THC2295607   | Unknown                                                                         | 1.00               | 1.56      | 9.46 | 39.88 | 7.22 | 27.41 | 1.00   | 0.77 | 23.75  | 111.45 | 1.00  | 1.16 | 5.22 | 7.81  | 3.26 | 15.30 | 1.00 | 0.92 | 1.80 | 3.49  | 1.81  | 8.38  |
| THC2437069 | THC2437069   | Unknown                                                                         | 1.00               | 1.50      | 6.48 | 29.43 | 5.64 | 20.48 | 1.00   | 1.46 | 6.03   | 21.73  | 1.00  | 1.55 | 2.76 | 7.86  | 0.58 | 3.81  | 1.00 | 1.03 | 3.20 | 6.74  | 2.74  | 19.18 |
| TP53JNP1   | NM 033285    | Homo sapiens tumor protein p53 inducible nuclear protein 1                      | 1.00               | 1.01      | 1.77 | 7.04  | 2.17 | 5.95  | 1.00   | 1.45 | 8.49   | 18.40  | 1.00  | 1.86 | 1.62 | 3.33  | 0.88 | 3.98  | 1.00 | 1.26 | 1.32 | 3.72  | 1.09  | 7.22  |
| WDR63      | NM_145172    | Homo sapiens WD repeat domain 63                                                | 1.00               | 0.83      | 1.13 | 3.23  | 1.05 | 1.50  | 1.00   | 1.01 | 3.89   | 5.51   | 1.00  | 1.04 | 0.87 | 2.97  | 1.12 | 0.93  | 2.12 | 3.74 | 1.22 | 2.12  | 1.36  | 3.74  |
