# Supplementary material
Source: PubMed Central journal article supplement (PMC2656188)
Supplement: 0813333106_ST3_PDF.pdf [file 0813333106_ST3_PDF.pdf]

**Table S3.** Real-time PCR analysis of genes expressed at higher levels in the lines without wt TP53 genes relative to those with wt TP53 genes following gamma irradiation.

| Symbol   | ID           | Gene Name                                                                     | HCT116 |       |         | DLD-1 |       | RKO  |      | SW48 |       |
|----------|--------------|-------------------------------------------------------------------------------|--------|-------|---------|-------|-------|------|------|------|-------|
|          |              |                                                                               | +/+    | -/-   | R248W/- | +/SIL | S241F | +/+  | -/-  | +/+  | -/-   |
| ASPM     | NM_016426    | Homo sapiens asp (abnormal spindle)-like, microcephaly associated             | 1.00   | 2.65  | 2.55    | 1.00  | 22.75 | 1.00 | 2.12 | 1.00 | 17.52 |
| AURKB    | NM_002497    | Homo sapiens aurora kinase B                                                  | 1.00   | 5.52  | 5.00    | 1.00  | 8.88  | 1.00 | 1.32 | 1.00 | 6.06  |
| BIRC5    | NM_152524    | Homo sapiens baculoviral IAP repeat-containing 5 (survivin), transcript       | 1.00   | 1.26  | 1.60    | 1.00  | 11.74 | 1.00 | 3.49 | 1.00 | 4.57  |
| BRRN1    | NM_022346    | Homo sapiens barren homolog 1 (Drosophila)                                    | 1.00   | 11.65 | 1.65    | 1.00  | 21.97 | 1.00 | 2.38 | 1.00 | 7.73  |
| C17orf41 | NM_003318    | Homo sapiens chromosome 17 open reading frame 41                              | 1.00   | 2.52  | 2.77    | 1.00  | 20.44 | 1.00 | 1.86 | 1.00 | 8.00  |
| CASC5    | NM_006845    | Homo sapiens cancer susceptibility candidate 5, transcript variant 1          | 1.00   | 1.46  | 2.13    | 1.00  | 28.86 | 1.00 | 2.79 | 1.00 | 4.51  |
| CCNA2    | NM_004217    | Homo sapiens cyclin A2                                                        | 1.00   | 5.21  | 4.01    | 1.00  | 28.28 | 1.00 | 2.08 | 1.00 | 13.12 |
| CCNB2    | NM_030932    | Homo sapiens cyclin B2                                                        | 1.00   | 4.61  | 2.27    | 1.00  | 7.48  | 1.00 | 1.64 | 1.00 | 10.58 |
| CDC2     | NM_012484    | Homo sapiens cell division cycle 2, G1 to S and G2 to M, transcript variant 1 | 1.00   | 2.39  | 3.62    | 1.00  | 22.63 | 1.00 | 2.16 | 1.00 | 6.73  |
| CDC25C   | NM_004701    | Homo sapiens cell division cycle 25C, transcript variant 1                    | 1.00   | 4.23  | 4.76    | 1.00  | 29.00 | 1.00 | 2.81 | 1.00 | 8.66  |
| CDCA5    | NM_016343    | Homo sapiens cell division cycle associated 5                                 | 1.00   | 5.49  | 4.60    | 1.00  | 18.14 | 1.00 | 1.86 | 1.00 | 6.06  |
| CDCA8    | NM_138419    | Homo sapiens cell division cycle associated 8                                 | 1.00   | 2.65  | 2.12    | 1.00  | 23.48 | 1.00 | 2.15 | 1.00 | 9.55  |
| CENPA    | NM_015341    | Homo sapiens centromere protein A, transcript variant 1                       | 1.00   | 4.59  | 4.77    | 1.00  | 23.74 | 1.00 | 3.37 | 1.00 | 6.73  |
| CENPE    | NM_207418    | Homo sapiens centromere protein E, 312kDa                                     | 1.00   | 2.66  | 2.56    | 1.00  | 13.46 | 1.00 | 3.01 | 1.00 | 7.48  |
| CENPF    | NM_017779    | Homo sapiens centromere protein F, 350/400ka (mitosin)                        | 1.00   | 2.39  | 2.03    | 1.00  | 55.85 | 1.00 | 1.87 | 1.00 | 8.76  |
| CIT      | NM_012415    | Homo sapiens citron (rho-interacting, serine/threonine kinase 21)             | 1.00   | 3.21  | 2.65    | 1.00  | 10.20 | 1.00 | 2.91 | 1.00 | 10.58 |
| CKAP2L   | NM_024857    | Homo sapiens cytoskeleton associated protein 2-like                           | 1.00   | 7.75  | 8.03    | 1.00  | 21.32 | 1.00 | 3.16 | 1.00 | 9.98  |
| DEPDC1   | NM_007174    | Homo sapiens DEP domain containing 1                                          | 1.00   | 3.03  | 3.41    | 1.00  | 17.80 | 1.00 | 3.87 | 1.00 | 9.52  |
| DIAPH3   | NM_006101    | Homo sapiens diaphanous homolog 3 (Drosophila), transcript variant 2          | 1.00   | 3.14  | 4.35    | 1.00  | 4.99  | 1.00 | 1.42 | 1.00 | 7.73  |
| FAM54A   | NM_170589    | Homo sapiens family with sequence similarity 54, member A                     | 1.00   | 4.33  | 2.75    | 1.00  | 23.93 | 1.00 | 1.58 | 1.00 | 8.69  |
| FAM72A   | NM_001237    | Homo sapiens family with sequence similarity 72, member A                     | 1.00   | 7.21  | 5.36    | 1.00  | 19.75 | 1.00 | 2.45 | 1.00 | 8.69  |
| FLJ39660 | NM_001067    | Homo sapiens hypothetical protein FLJ39660                                    | 1.00   | 1.82  | 1.65    | 1.00  | 13.00 | 1.00 | 0.76 | 1.00 | 7.48  |
| GTSE1    | BC062449     | Homo sapiens G-2 and S-phase expressed 1                                      | 1.00   | 2.96  | 2.84    | 1.00  | 32.00 | 1.00 | 2.48 | 1.00 | 11.31 |
| HCAP-G   | NM_001813    | Homo sapiens chromosome condensation protein G                                | 1.00   | 5.47  | 5.52    | 1.00  | 15.49 | 1.00 | 3.79 | 1.00 | 5.89  |
| HMMR     | NM_001790    | Homo sapiens hyaluronan-mediated motility receptor (RHAMM), transcript        | 1.00   | 4.76  | 3.87    | 1.00  | 12.59 | 1.00 | 2.52 | 1.00 | 11.34 |
| KIF18A   | NM_031217    | Homo sapiens kinesin family member 18A                                        | 1.00   | 2.14  | 2.94    | 1.00  | 19.07 | 1.00 | 1.77 | 1.00 | 6.76  |
| KIF20A   | NM_018101    | Homo sapiens kinesin family member 20A                                        | 1.00   | 2.83  | 3.95    | 1.00  | 30.98 | 1.00 | 4.16 | 1.00 | 10.20 |
| KIF2C    | NM_152515    | Homo sapiens kinesin family member 2C                                         | 1.00   | 4.23  | 3.50    | 1.00  | 15.60 | 1.00 | 2.56 | 1.00 | 12.74 |
| KNTC2    | NM_018136    | Homo sapiens kinetochore associated 2                                         | 1.00   | 5.33  | 5.28    | 1.00  | 24.00 | 1.00 | 2.15 | 1.00 | 7.21  |
| NEK2     | NM_001012271 | Homo sapiens NIMA (never in mitosis gene a)-related kinase 2                  | 1.00   | 4.29  | 4.77    | 1.00  | 27.05 | 1.00 | 1.96 | 1.00 | 6.37  |
| PLK1     | NM_001809    | Homo sapiens polo-like kinase 1 (Drosophila)                                  | 1.00   | 3.87  | 3.49    | 1.00  | 16.00 | 1.00 | 2.30 | 1.00 | 9.28  |
| RAD54B   | NM_005733    | Homo sapiens RAD54 homolog B (S. cerevisiae)                                  | 1.00   | 3.61  | 3.30    | 1.00  | 8.28  | 1.00 | 1.04 | 1.00 | 9.09  |
| SGOL2    | NM_001786    | Homo sapiens shugoshin-like 2 (S. pombe)                                      | 1.00   | 4.06  | 2.10    | 1.00  | 13.00 | 1.00 | 2.70 | 1.00 | 11.89 |
| TOP2A    | NM_005030    | Homo sapiens topoisomerase (DNA) II alpha 170kDa                              | 1.00   | 2.18  | 1.84    | 1.00  | 11.72 | 1.00 | 2.03 | 1.00 | 6.19  |
| TTK      | NM_080668    | Homo sapiens TTK protein kinase                                               | 1.00   | 4.29  | 4.14    | 1.00  | 16.62 | 1.00 | 2.56 | 1.00 | 10.66 |

Only genes listed in Table 3 are included

Only genes listed in Table 3 are included
