# Supplementary material
Source: PubMed Central journal article supplement (PMC2656188)
Supplement: 0813333106_ST4_PDF.pdf [file 0813333106_ST4_PDF.pdf]

**Table S4.** Gene expression before and after gamma irradiation – wt p53 down-regulated genes.

| GeneName    | ID          | Description                                                                      | Irradiation, 12 Gy |      |      |      |      |      |      |      |      |      |      |      | HCT11s |      |      |      | DLD-1 |      |      |      | RKO  |      |      |      | SW48 |      |  |  |
|-------------|-------------|----------------------------------------------------------------------------------|--------------------|------|------|------|------|------|------|------|------|------|------|------|--------|------|------|------|-------|------|------|------|------|------|------|------|------|------|--|--|
|             |             |                                                                                  | No                 | Yes  | No   | Yes  | No   | Yes  | No   | Yes  | No   | Yes  | No   | Yes  | No     | Yes  | No   | Yes  | No    | Yes  | No   | Yes  | No   | Yes  | No   | Yes  | No   | Yes  |  |  |
| A_S_P_M     | NM_016426   | Homo sapiens asp (abnormal spindle)-like, microscopally associated (Drosophila)  | 1.00               | 0.78 | 0.85 | 0.89 | 1.49 | 2.62 | 0.68 | 1.27 | 0.95 | 2.02 | 1.00 | 0.19 | 1.04   | 1.17 | 1.00 | 1.07 | 0.87  | 1.22 | 1.58 | 2.69 | 1.00 | 0.25 | 0.61 | 0.88 | 0.71 | 0.92 |  |  |
| AURKB       | NM_002497   | Homo sapiens aurora kinase B                                                     | 1.00               | 0.44 | 1.14 | 0.87 | 1.19 | 1.29 | 0.61 | 0.59 | 0.84 | 0.92 | 1.00 | 0.25 | 0.96   | 0.72 | 1.00 | 0.47 | 0.82  | 0.67 | 1.80 | 1.13 | 1.00 | 0.19 | 0.48 | 0.36 | 0.61 | 0.63 |  |  |
| B_I_C_D_5   | NM_152524   | Homo sapiens baculoviral IAP repeat-containing 5 (sunvvin), transcript variant 3 | 1.00               | 0.62 | 0.82 | 0.78 | 1.09 | 1.57 | 0.76 | 1.04 | 1.05 | 1.50 | 1.00 | 0.21 | 0.72   | 0.65 | 1.00 | 1.07 | 0.96  | 0.96 | 1.52 | 2.44 | 1.00 | 0.22 | 0.61 | 0.42 | 0.63 | 0.60 |  |  |
| BRN1        | NM_022346   | Homo sapiens barren homolog 1 (Drosophila)                                       | 1.00               | 0.57 | 0.65 | 0.69 | 1.26 | 1.87 | 0.74 | 0.88 | 1.03 | 1.51 | 1.00 | 0.22 | 1.03   | 0.97 | 1.00 | 0.94 | 0.70  | 0.80 | 1.65 | 1.95 | 1.00 | 0.31 | 0.70 | 0.60 | 0.93 | 0.96 |  |  |
| C_17orf141  | NM_003318   | Homo sapiens chromosome 17 open reading frame 41                                 | 1.00               | 0.83 | 0.88 | 1.09 | 1.44 | 1.73 | 1.02 | 1.00 | 1.60 | 1.89 | 1.00 | 0.41 | 0.83   | 1.04 | 1.00 | 0.83 | 1.29  | 1.22 | 1.47 | 1.74 | 1.00 | 0.46 | 0.87 | 0.77 | 1.01 | 1.06 |  |  |
| CASC5       | NM_008545   | Homo sapiens cancer susceptibility candidate 5, transcript variant 1             | 1.00               | 0.65 | 0.47 | 0.48 | 1.47 | 2.07 | 0.55 | 0.77 | 1.20 | 1.65 | 1.00 | 0.06 | 0.40   | 0.60 | 1.00 | 0.59 | 1.13  | 2.02 | 1.32 | 1.94 | 1.00 | 0.34 | 0.75 | 0.65 | 0.82 | 0.86 |  |  |
| C_CNA2      | NM_004217   | Homo sapiens cyclin A2                                                           | 1.00               | 0.51 | 0.81 | 0.71 | 1.33 | 2.46 | 0.65 | 0.84 | 0.88 | 1.51 | 1.00 | 0.21 | 0.96   | 0.94 | 1.00 | 0.72 | 0.54  | 0.52 | 1.45 | 1.47 | 1.00 | 0.26 | 0.65 | 0.54 | 0.85 | 0.80 |  |  |
| CCNB2       | NM_030932   | Homo sapiens cyclin B2                                                           | 1.00               | 0.66 | 1.08 | 0.93 | 1.52 | 2.33 | 0.69 | 1.22 | 1.04 | 1.65 | 1.00 | 0.41 | 1.02   | 0.91 | 1.00 | 1.00 | 0.90  | 1.06 | 1.46 | 2.21 | 1.00 | 0.26 | 0.53 | 0.43 | 0.70 | 0.65 |  |  |
| C_D_C_2     | NM_012484   | Homo sapiens cell division cycle 2, G1 to S and G2 to M, transcript variant 1    | 1.00               | 0.83 | 1.11 | 1.11 | 1.40 | 2.75 | 0.79 | 1.33 | 0.99 | 1.78 | 1.00 | 0.34 | 0.90   | 1.04 | 1.00 | 1.20 | 1.13  | 1.21 | 1.59 | 2.45 | 1.00 | 0.41 | 0.74 | 0.73 | 1.01 | 1.02 |  |  |
| CDCC2C      | NM_004701   | Homo sapiens cell division cycle 25C, transcript variant 1                       | 1.00               | 0.73 | 1.21 | 1.06 | 1.66 | 3.03 | 0.74 | 1.57 | 1.23 | 2.24 | 1.00 | 0.24 | 1.13   | 1.06 | 1.00 | 1.07 | 0.99  | 1.51 | 1.99 | 2.98 | 1.00 | 0.28 | 0.46 | 0.51 | 0.60 | 0.64 |  |  |
| C_D_C_A_5   | NM_016343   | Homo sapiens cell division cycle associated 5                                    | 1.00               | 0.49 | 0.94 | 0.93 | 1.28 | 1.82 | 0.80 | 0.83 | 1.03 | 1.35 | 1.00 | 0.21 | 0.71   | 0.82 | 1.00 | 1.98 | 2.46  | 2.35 | 3.71 | 4.43 | 1.00 | 0.33 | 0.73 | 0.61 | 0.78 | 0.86 |  |  |
| CDCA8       | NM_138419   | Homo sapiens cell division cycle associated 8                                    | 1.00               | 0.59 | 1.16 | 1.02 | 1.42 | 2.09 | 0.77 | 1.03 | 1.02 | 1.61 | 1.00 | 0.15 | 0.65   | 0.54 | 1.00 | 1.01 | 0.95  | 1.04 | 1.57 | 2.03 | 1.00 | 0.24 | 0.57 | 0.43 | 0.60 | 0.64 |  |  |
| C_E_N_P_A   | NM_015341   | Homo sapiens centromere protein A, transcript variant 1                          | 1.00               | 0.37 | 0.60 | 0.44 | 1.30 | 1.73 | 0.43 | 0.57 | 0.81 | 1.18 | 1.00 | 0.13 | 1.20   | 1.27 | 1.00 | 0.87 | 0.62  | 0.63 | 2.21 | 2.53 | 1.00 | 0.18 | 0.35 | 0.30 | 0.51 | 0.56 |  |  |
| CENPE       | NM_007418   | Homo sapiens centromeres protein E, 310kDa                                       | 1.00               | 0.63 | 0.65 | 0.68 | 1.55 | 2.19 | 0.68 | 1.00 | 1.05 | 1.57 | 1.00 | 0.24 | 0.72   | 0.66 | 1.00 | 0.81 | 0.63  | 0.75 | 1.72 | 1.88 | 1.00 | 0.37 | 0.60 | 0.54 | 0.79 | 0.77 |  |  |
| C_E_N_P_F   | NM_017779   | Homo sapiens centromere protein F, 350/400kDa (mitotin)                          | 1.00               | 0.60 | 0.80 | 0.69 | 1.40 | 2.14 | 0.59 | 0.96 | 1.20 | 1.98 | 1.00 | 0.07 | 1.19   | 1.30 | 1.00 | 0.69 | 0.84  | 1.05 | 1.35 | 1.62 | 1.00 | 0.24 | 0.56 | 0.42 | 0.62 | 0.73 |  |  |
| CIT         | NM_012415   | Homo sapiens citron (Rho-interacting, serine/threonine kinase 21)                | 1.00               | 0.84 | 1.25 | 1.10 | 1.88 | 2.32 | 0.99 | 1.51 | 1.54 | 2.16 | 1.00 | 0.42 | 1.10   | 1.07 | 1.00 | 0.88 | 0.84  | 1.01 | 1.44 | 2.40 | 1.00 | 0.30 | 0.58 | 0.51 | 0.68 | 0.78 |  |  |
| C_K_A_P_2_L | NM_024857   | Homo sapiens cytoskeleton associated protein 2-like                              | 1.00               | 0.52 | 0.72 | 0.62 | 1.54 | 2.40 | 0.66 | 0.91 | 1.15 | 1.69 | 1.00 | 0.12 | 0.78   | 0.71 | 1.00 | 0.64 | 1.01  | 1.45 | 1.48 | 1.72 | 1.00 | 0.30 | 0.60 | 0.47 | 0.77 | 0.64 |  |  |
| DEPDC1      | NM_007174   | Homo sapiens DEP domain containing 1                                             | 1.00               | 0.51 | 0.61 | 0.48 | 1.17 | 1.81 | 0.90 | 1.04 | 1.10 | 1.66 | 1.00 | 0.26 | 0.91   | 0.87 | 1.00 | 1.17 | 0.64  | 0.81 | 1.35 | 2.49 | 1.00 | 0.26 | 0.53 | 0.46 | 0.97 | 0.80 |  |  |
| D_I_A_P_H_3 | NM_006101   | Homo sapiens diaphanous homolog 3 (Drosophila), transcript variant 2             | 1.00               | 1.00 | 1.46 | 1.93 | 1.78 | 3.06 | 0.62 | 1.30 | 1.21 | 2.26 | 1.00 | 0.26 | 0.37   | 0.60 | 1.00 | 0.86 | 3.32  | 6.13 | 2.04 | 2.81 | 1.00 | 0.37 | 0.67 | 0.60 | 1.12 | 0.87 |  |  |
| FAM54A      | NM_170589   | Homo sapiens family with sequence similarity 54, member A                        | 1.00               | 0.63 | 0.66 | 0.78 | 1.32 | 2.80 | 0.62 | 0.85 | 0.91 | 1.60 | 1.00 | 0.21 | 0.85   | 0.97 | 1.00 | 1.13 | 0.87  | 1.09 | 1.63 | 2.41 | 1.00 | 0.38 | 0.66 | 0.74 | 1.04 | 1.28 |  |  |
| F_A_H_T_2_A | NM_001237   | Homo sapiens family with sequence similarity 72, member A                        | 1.00               | 0.55 | 1.29 | 1.05 | 1.62 | 2.90 | 0.68 | 1.04 | 0.92 | 1.31 | 1.00 | 0.33 | 1.32   | 1.16 | 1.00 | 0.69 | 0.66  | 1.06 | 1.74 | 2.48 | 1.00 | 0.34 | 0.59 | 0.51 | 0.96 | 0.85 |  |  |
| FLJ39660    | NM_001067   | Homo sapiens hypothetical protein FLJ39660                                       | 1.00               | 0.95 | 0.83 | 1.08 | 1.74 | 2.24 | 0.90 | 1.35 | 1.32 | 2.22 | 1.00 | 0.18 | 0.61   | 0.83 | 1.00 | 0.75 | 1.60  | 1.72 | 1.60 | 1.91 | 1.00 | 0.39 | 0.73 | 0.87 | 0.63 | 0.89 |  |  |
| S_T_S_E_1   | BC062449    | Homo sapiens G-2 and S-phase expressed 1                                         | 1.00               | 0.50 | 0.86 | 0.62 | 1.25 | 1.67 | 0.73 | 0.90 | 1.46 | 2.09 | 1.00 | 0.14 | 0.84   | 0.82 | 1.00 | 0.90 | 1.42  | 1.49 | 2.31 | 2.08 | 1.00 | 0.20 | 0.42 | 0.33 | 0.49 | 0.55 |  |  |
| HCAP-G      | NM_021813   | Homo sapiens chromosome condensation protein G                                   | 1.00               | 0.54 | 0.97 | 0.79 | 1.39 | 1.99 | 0.58 | 0.70 | 0.87 | 1.16 | 1.00 | 0.18 | 0.51   | 0.50 | 1.00 | 0.74 | 0.80  | 0.72 | 1.64 | 1.59 | 1.00 | 0.30 | 0.62 | 0.51 | 0.75 | 0.66 |  |  |
| H_M_M_R     | NM_001790   | Homo sapiens hyaluronan-mediated motility receptor (RHAMM), transcript variant 1 | 1.00               | 0.83 | 0.95 | 0.97 | 1.55 | 3.46 | 0.71 | 1.67 | 1.05 | 2.49 | 1.00 | 0.25 | 0.67   | 0.78 | 1.00 | 1.42 | 0.82  | 1.52 | 1.49 | 2.87 | 1.00 | 0.32 | 0.45 | 0.55 | 0.75 | 0.92 |  |  |
| KIF18A      | NM_031217   | Homo sapiens kinesin family member 18A                                           | 1.00               | 0.58 | 0.70 | 0.70 | 1.14 | 1.91 | 1.20 | 1.31 | 2.06 | 2.45 | 1.00 | 0.50 | 1.19   | 1.40 | 1.00 | 1.16 | 1.00  | 1.35 | 2.62 | 4.19 | 1.00 | 0.31 | 0.66 | 0.65 | 0.78 | 1.06 |  |  |
| K_I_F_2_D_A | NM_018101   | Homo sapiens kinesin family member 20A                                           | 1.00               | 0.54 | 0.69 | 0.44 | 1.24 | 2.11 | 0.66 | 1.02 | 1.12 | 2.31 | 1.00 | 0.15 | 1.03   | 0.70 | 1.00 | 0.83 | 0.75  | 0.77 | 1.92 | 2.47 | 1.00 | 0.21 | 0.43 | 0.35 | 0.54 | 0.59 |  |  |
| KIF2C       | NM_152515   | Homo sapiens kinesin family member 2C                                            | 1.00               | 0.69 | 1.11 | 0.89 | 1.48 | 2.10 | 0.62 | 0.93 | 0.84 | 1.56 | 1.00 | 0.27 | 1.00   | 0.91 | 1.00 | 0.88 | 1.00  | 1.94 | 1.93 | 2.07 | 1.00 | 0.27 | 0.51 | 0.46 | 0.60 | 0.77 |  |  |
| K_N_T_C_2   | NM_018136   | Homo sapiens kinetochore associated 2                                            | 1.00               | 0.39 | 0.96 | 0.85 | 1.50 | 1.97 | 0.61 | 0.80 | 0.87 | 1.38 | 1.00 | 0.15 | 0.86   | 0.76 | 1.00 | 0.81 | 0.77  | 0.76 | 1.84 | 1.78 | 1.00 | 0.23 | 0.55 | 0.43 | 0.70 | 0.66 |  |  |
| NEK2        | NM_00102271 | Homo sapiens NIMA (never in mitosis gene a)-related kinase 2                     | 1.00               | 0.68 | 1.33 | 1.19 | 1.69 | 3.26 | 0.74 | 1.45 | 1.26 | 2.62 | 1.00 | 0.26 | 1.13   | 1.04 | 1.00 | 1.12 | 1.30  | 1.74 | 1.71 | 2.77 | 1.00 | 0.20 | 0.46 | 0.39 | 0.74 | 0.68 |  |  |
| P_L_K_1     | NM_001809   | Homo sapiens polo-like kinase 1 (Drosophila)                                     | 1.00               | 0.52 | 0.69 | 0.60 | 1.45 | 1.93 | 0.65 | 0.91 | 0.94 | 1.41 | 1.00 | 0.20 | 0.80   | 0.56 | 1.00 | 0.95 | 0.66  | 0.91 | 1.65 | 2.05 | 1.00 | 0.23 | 0.50 | 0.45 | 0.68 | 0.62 |  |  |
| RADS4B      | NM_005733   | Homo sapiens RADS4 homolog B (S)                                                 | 1.00               | 0.76 | 0.73 | 0.91 | 1.19 | 2.46 | 0.95 | 0.99 | 1.17 | 1.67 | 1.00 | 0.53 | 1.01   | 1.14 | 1.00 | 1.18 | 1.29  | 1.28 | 2.02 | 2.75 | 1.00 | 0.53 | 0.78 | 0.75 | 1.51 | 1.48 |  |  |
| S_G_O_L_2   | NM_001786   | Homo sapiens shugoshin-like 2 (S. pombe)                                         | 1.00               | 0.70 | 0.85 | 0.72 | 1.53 | 2.89 | 0.72 | 1.18 | 1.11 | 2.02 | 1.00 | 0.28 | 0.99   | 1.00 | 1.00 | 1.26 | 0.92  | 1.27 | 1.53 | 2.68 | 1.00 | 0.32 | 0.63 | 0.59 | 0.85 | 0.88 |  |  |
| TOP2A       | NM_005030   | Homo sapiens topoisomerase (DNA) II alpha 170kDa                                 | 1.00               | 0.78 | 0.80 | 0.85 | 1.53 | 2.28 | 0.74 | 1.28 | 1.19 | 1.86 | 1.00 | 0.38 | 0.82   | 1.03 | 1.00 | 0.93 | 0.75  | 1.02 | 1.25 | 2.00 | 1.00 | 0.37 | 0.63 | 0.76 | 0.78 | 1.01 |  |  |
| TTK         | NM_080668   | Homo sapiens TTK protein kinase                                                  | 1.00               | 0.57 | 0.79 | 0.68 | 1.32 | 2.29 | 0.68 | 1.00 | 1.04 | 1.79 | 1.00 | 0.38 | 1.20   | 1.12 | 1.00 | 0.93 | 0.92  | 0.87 | 1.59 | 2.07 | 1.00 | 0.32 | 0.70 | 0.61 | 0.94 | 0.92 |  |  |

Only genes listed in Table 2 are included.
