# Supplementary material
Source: PubMed Central journal article supplement (PMC2656188)
Supplement: 0813333106_ST5_PDF.pdf [file 0813333106_ST5_PDF.pdf]

**Table S5.** Primers used for verification of targeted homologous recombination.

| PCR of genomic DNA to confirm deletion of exon 2                                                   |         |                          |
|----------------------------------------------------------------------------------------------------|---------|--------------------------|
| 11 4-P53 5'screen                                                                                  | forward | 5'-ctgggagaaggtgcatgat   |
| 25-P53N EOKO                                                                                       | reverse | 5'-gttggtcccagtcatagccg  |
| Forward primer is outside homology arm; reverse primer is within targeting vector                  |         |                          |
| PCR of genomic DNA to confirm cre excision of exon 2 targeting vector                              |         |                          |
| 92-P53 exon 2                                                                                      | forward | 5'-gggtggaagtgtctcatgc   |
| 93-P53 exon 2                                                                                      | reverse | 5'-tcccacaggtctctgctagg  |
| Both primers are in intronic regions flanking exon 2.                                              |         |                          |
| PCR of genomic DNA to check for insertion of targeting sequence of KI clones prior to cre excision |         |                          |
| 1 25-p53e7screen                                                                                   | forward | 5'-ctgccgtctccagttgc     |
| 25-P53N EOKO                                                                                       | reverse | 5'-gttggtcccagtcatagccg  |
| Forward primer is outside homology arm; reverse primer is within targeting vector                  |         |                          |
| PCR of genomic DNA to confirm cre excision of KI clones                                            |         |                          |
| 1 25-p53e7screen                                                                                   | forward | 5'-ctgccgtctccagttgc     |
| 1 30-SEPTCREOUT                                                                                    | reverse | 5'-gcacagtgtacctaaaattgg |
| Forward primer is outside homology arm; reverse primer is within targeting vector                  |         |                          |
| RT-PCR of exon 7 for confirmation of knockin sequence                                              |         |                          |
| 1 54-p53e7rt                                                                                       | forward | 5'-gtggtggtgccctatgac    |
| 1 55-p53e7                                                                                         | reverse | 5'-acaaacacgcacctcaaagc  |
