# Supplementary material
Source: PubMed Central journal article supplement (PMC2656188)
Supplement: 0813333106_ST6_PDF.pdf [file 0813333106_ST6_PDF.pdf]

**Table S6.** Primers used for qPCR to confirm microarray results

| Genes           | direction | Sequence                       | direction | sequence                  |
|-----------------|-----------|--------------------------------|-----------|---------------------------|
| 1 80-aurka      | forward   | 5'-ccaggccactgaataacacc        | reverse   | 5'-gccagaataaactgctttgc   |
| 1 82-aurkb      | forward   | 5'-cggaagagcctgtcacc           | reverse   | 5'-gtttccaaactgcctttgc    |
| 1 84-bub1       | forward   | 5'-gaagcccacatgcagagc          | reverse   | 5'-tgaattctgggtcattgtgg   |
| 1 86-bub1 b     | forward   | 5'-ggcgggtgaagaaggaagg         | reverse   | 5'-aacatccagaggggtcatttcc |
| 1 88-nek2       | forward   | 5'-gcttcgtgaactgaaacatcc       | reverse   | 5'-caccatcactctgtctgtgg   |
| 1 90-ttk        | forward   | 5'-ggaatccgaggatttaagtgg       | reverse   | 5'-cagtcctctggtgttttgc    |
| 1 92-cdc2       | forward   | 5'-aaactacaggtcaagtgttagcc     | reverse   | 5'-aatcctgcataagcacatcc   |
| 1 94-cdc25c     | forward   | 5'-gaacaggccaagactgaagc        | reverse   | 5'-cttgggtttccctgacacg    |
| 1 96-plk1       | forward   | 5'-aggcccgatactacctaagg        | reverse   | 5'-gaaactgtgccttctttgc    |
| 1 98-plk4       | forward   | 5'-cattgccaattgaaacatcc        | reverse   | 5'-atctgggtgatgaagtgtcg   |
| 200-top2a       | forward   | 5'-ctgctggacaacaaacaaagg       | reverse   | 5'-acacaatttggctccatagc   |
| 202-atad2       | forward   | 5'-aaactaccaccggacacg          | reverse   | 5'-tgtttctagccctcaatgacc  |
| 204-chek1       | forward   | 5'-gcgtgccgtagactgtcc          | reverse   | 5'-ctctgagcatctggttcagg   |
| 206-fbxo5       | forward   | 5'-agatcgggagatgctgaagg        | reverse   | 5'-ggatcttctccaagtgtgc    |
| 208-hmmr        | forward   | 5'-cgattcaatgaccttctgg         | reverse   | 5'-tctagctgaagcaggcaagg   |
| 21 0-birc5      | forward   | 5'-aagaactggccttcttgg          | reverse   | 5'-cccaaagtgtggtattacagg  |
| 21 2-kif20a     | forward   | 5'-cccattgttgagctcacagc        | reverse   | 5'-ggacacaacctgatcttcc    |
| 21 4-diaph3     | forward   | 5'-tctgcggtatgcattgtagg        | reverse   | 5'-taaccagggcattgatgagc   |
| 21 6-aspm       | forward   | 5'-tgtctctagccacttctgc         | reverse   | 5'-gcctctttgagtggtgtcc    |
| 21 8-casc5      | forward   | 5'-caatatagagagacctgttagaagacg | reverse   | 5'-agaagttgcagctgagatgg   |
| 220-gnl3l       | forward   | 5'-ccaggtgaaggtccaagg          | reverse   | 5'-tctccctcatctcctaacc    |
| 222-kif 1 1     | forward   | 5'-cgtctgcgaagaagaaagagg       | reverse   | 5'-gagctctgtcagccaatcc    |
| 224-kif 1 8a    | forward   | 5'-aaggatcttaattgtattgtatgc    | reverse   | 5'-catcactccaggtcatcagc   |
| 226-kif23       | forward   | 5'-cccaaacgacacctaaagacc       | reverse   | 5'-cattgaccaagggattagcc   |
| 228-kif2c       | forward   | 5'-tctcgatcaaatccaacg          | reverse   | 5'-tcggatgaaggaagaagc     |
| 230-kntc2       | forward   | 5'-tcccaggatgtaaataaacaagg     | reverse   | 5'-gctttgcattaagtgggtctcg |
| 232-rad54b      | forward   | 5'-cctacactggcaacattagatcc     | reverse   | 5'-ttccaatgtcttgccttcc    |
| 234-arhgap1 1 a | forward   | 5'-cgcaggagacatgaaacagc        | reverse   | 5'-ggtgcagaagataggcaacc   |
| 236-sgol2       | forward   | 5'-cacaacaacagggcattagc        | reverse   | 5'-tgaatggaactcagaagactgc |
| 238-sass6       | forward   | 5'-gtgctgttccaccaactagtcc      | reverse   | 5'-atccgtgtcatcagtcagagc  |
| 240-smc4        | forward   | 5'-ccagcaatgaccaatgaagc        | reverse   | 5'-aacattggattggccactgc   |
| 242-tmem 149    | forward   | 5'-ccgccttgaataactggaacc       | reverse   | 5'-tgcccagaagaacactttcg   |
| 244-brca1       | forward   | 5'-tctggagttgatcaaggaacc       | reverse   | 5'-actccaaacctgtgtcaagc   |
| 246-cenpe       | forward   | 5'-aacagcagagaagaatcacttgg     | reverse   | 5'-agccttgtatggcagaatcg   |
| 248-cenpf       | forward   | 5'-cagcaaaaggcagtttcagc        | reverse   | 5'-ctggaattcactgtgactcc   |
| 250-cenpq       | forward   | 5'-gaagttgtgtgtcagagaataagg    | reverse   | 5'-ttccatcatagttgcaaatgg  |
| 252-c1 5orf20   | forward   | 5'-cgactctgtcaccatcagc         | reverse   | 5'-cagctgttctcagaaagc     |
| 254-c1 5orf23   | forward   | 5'-acgagagcagaaagactgc         | reverse   | 5'-ctggacctctcctgaatgaagc |
| 256-c1 7orf41 c | forward   | 5'-gagaaatctgaagcaactgatgg     | reverse   | 5'-gagcgccttaagggtatcg    |
| 258-c9orf 1 00  | forward   | 5'-ctctctgggagctcatctacg       | reverse   | 5'-ttcctgaagccgtacaacc    |
| 260-hcap-g      | forward   | 5'-taaacgtgaaccagctgtgg        | reverse   | 5'-ctcactgcattgtgtttgc    |
| 262-ccna2       | forward   | 5'-ggtactgaagtcgggaacc         | reverse   | 5'-atccacatgaatgggaacg    |
| 264-ccnb2       | forward   | 5'-gacgggtgccagtgatttgg        | reverse   | 5'-gggtgactggaactttgg     |
| 266-ckap2       | forward   | 5'-agtccagggcgcagctcc          | reverse   | 5'-tttagtccttctgaaactgg   |
| 268-ckap2l      | forward   | 5'-gaagagcggcagagaagc          | reverse   | 5'-tgggacctgcagattagg     |
| 270-dtl         | forward   | 5'-tggatggtcttcaataacc         | reverse   | 5'-agccatcattcttgaagc     |
| 272-depdc1      | forward   | 5'-caggagaagcagtgatttgg        | reverse   | 5'-tttctaattctggatccttgc  |
| 274-fam54a      | forward   | 5'-ctggaaccttctgaagacc         | reverse   | 5'-cccgaactagtcgcaagg     |
| 276-fam72a      | forward   | 5'-agacatcccctccaacagc         | reverse   | 5'-tgttgaggaaagagagcagg   |
| 278-brm1        | forward   | 5'-ctgactcacctcgtatttgg        | reverse   | 5'-gtgtggcatccagactacc    |
| 280-cdca3       | forward   | 5'-cctatgaagaccagcagtg         | reverse   | 5'-ctgtctgtctcctccttgg    |
| 282-cdca5       | forward   | 5'-ccatctcctaagcctctgc         | reverse   | 5'-ctgggacctctacagcatgg   |
| 284-cdca8       | forward   | 5'-gccaagaccaactccttacg        | reverse   | 5'-caagggcgaagtgtcaagc    |
| 286-cenpa       | forward   | 5'-tccgaaagctcagaagagc         | reverse   | 5'-ccagttgcacatccttgg     |
| 288-c1 4orf 106 | forward   | 5'-gcgtgacaagcaagaacagc        | reverse   | 5'-gaggaactcctggactgagg   |
| 290-cit         | forward   | 5'-cagcagatgtctccttctcc        | reverse   | 5'-tgactctcagcaagtgacc    |
| 292-gtse1       | forward   | 5'-cgatcttctcattgtcttctcg      | reverse   | 5'-acacctccacgaacttctcc   |
| 294-f lj39660   | forward   | 5'-ttctcaaccacatcaacg          | reverse   | 5'-tctggagttccaatagcc     |
